# Supplementary material
Source: PubMed Central journal article supplement (PMC3518313)
Supplement: NIHMS419602-supplement-1_si_001.pdf [file NIHMS419602-supplement-1_si_001.pdf]

## Supporting Information

A Pre-Steady State Kinetic Analysis of the  $\alpha$ Y60W mutant of *trans*-3-Chloroacrylic Acid  
Dehalogenase: Implications for the Mechanism of the Wild-type Enzyme<sup>†</sup>

Jamison P. Huddleston<sup>‡</sup>, Gottfried K. Schroeder<sup>‡</sup>, Kenneth A. Johnson<sup>§,||</sup>,

and Christian P. Whitman<sup>‡,||,\*</sup>

Division of Medicinal Chemistry, College of Pharmacy, and the Department of  
Chemistry and Biochemistry, Institute for Cellular and Molecular Biology, University of  
Texas, Austin, TX 78712

**Table S1.** Summary of the Docking Study Results Using **9** and the Experimentally Determined  $K_m$  and  $k_{cat}$

| Enzyme         | $\Delta G^a$<br>(kcal/mol) | $\Delta G^b$<br>(kcal/mol) | $K_m$<br>( $\mu$ M) | $k_{cat}$<br>( $s^{-1}$ ) |
|----------------|----------------------------|----------------------------|---------------------|---------------------------|
| Wild-type      | -4.8                       | -3.5                       | $120 \pm 10$        | $2.5 \pm 0.1$             |
| $\alpha$ Y60W  | -5.1                       | -3.6                       | $70 \pm 3.5$        | $2.5 \pm 0.1$             |
| $\alpha$ M7W   | -4.8                       | -                          | $120 \pm 10$        | $0.6 \pm 0.1$             |
| $\alpha$ L57W  | -4.0                       | -                          | N/A                 | N/A                       |
| $\beta$ I37W   | -4.8                       | -                          | >40,000             | N/A                       |
| $\alpha$ F390W | -4.9                       | -                          | -                   | -                         |
| $\alpha$ F50W  | -5.0                       | -                          | -                   | -                         |

<sup>a</sup>The  $\Delta G$  value for binding as predicted by AutoDock Vina for the binding of **9** to CaaD and mutants (Figure 2A).<sup>1</sup> <sup>b</sup>The  $\Delta G$  for the binding of **9** to CaaD in which the  $\alpha$ E52 points into the active site such that it can carry out the proposed chemistry (Figure 2C).

**Table S2.** Rates from the Conventional Analysis and Individual Fit by Simulation of the Binding of Bromide Ion and **4** to the  $\alpha$ Y60W Mutant of CaaD

| Substrate             | $k_{\text{on}}$<br>( $\mu\text{M}^{-1} \text{s}^{-1}$ ) | $k_{\text{off}}$<br>( $\text{s}^{-1}$ ) | $K_{\text{d}}$<br>( $\mu\text{M}$ ) | $F_0$           | $\Delta F$        | $f/f_0^a$       |
|-----------------------|---------------------------------------------------------|-----------------------------------------|-------------------------------------|-----------------|-------------------|-----------------|
| Bromide <sup>b</sup>  | –                                                       | –                                       | $7400 \pm 550$                      | $3.94 \pm 0.01$ | $0.56 \pm 0.01$   | $1.14 \pm 0.02$ |
|                       | $0.016 \pm 0.002^{c,d}$                                 | Fast <sup>d</sup>                       | $12000^e \pm 250$                   | $3.95^f$        | $0.67 \pm 0.12^c$ | $1.17 \pm 0.03$ |
| <b>4</b> <sup>b</sup> | $0.025 \pm 0.001$                                       | $28 \pm 1.6$                            | $1120^g/380^h$                      | $4.52 \pm 0.03$ | $0.75 \pm 0.02$   | $1.16 \pm 0.03$ |
|                       | $0.028 \pm 0.005^c$                                     | $17 \pm 3^c$                            | $600^e \pm 250$                     | $4.56^f$        | $0.64 \pm 0.05^c$ | $1.14 \pm 0.01$ |

<sup>a</sup>The value for  $f/f_0$  was obtained using the following equation:  $\frac{f}{f_0} = \frac{\Delta F + F_0}{F_0}$ . Error ranges on

these values were calculated using standard propagation of errors. <sup>b</sup>The first row is based upon the conventional analysis. The second row (shaded) is based from the individual fits to the data by simulation. <sup>c</sup>Error ranges were calculated from FitSpace analysis of the individual fit by simulation with a threshold of 5% deviation from the minimal SSE. <sup>d</sup>Due to the rapid equilibrium (<1.3 ms) between bromide ion and the  $\alpha$ Y60W mutant of CaaD, the data only defines the  $K_{\text{d}}$  for bromide binding to free  $E$ . This  $k_{\text{on}}$  affords the calculation of the defined  $K_{\text{d}}$  when the  $k_{\text{off}}$  is assumed to be  $200 \text{ s}^{-1}$ . <sup>e</sup>This value was calculated by dividing  $k_{\text{off}} / k_{\text{on}}$ . <sup>f</sup>These values were held fixed during the fit by simulation. <sup>g</sup> $K_{\text{d}}$  is calculated by dividing  $k_{\text{off}} / k_{\text{on}}$  using the values from the conventional analysis of the binding of **4** to  $\alpha$ Y60W-CaaD in a stopped-flow experiment (Figure S6A). <sup>h</sup> $K_{\text{d}}$  is calculated from the conventional analysis of the saturation of the fluorescence signal in the stopped-flow experiment monitoring the binding of **4** to  $\alpha$ Y60W-CaaD (Figure S6B).

**Table S3.** Kinetic Rates Obtained from Conventional Analysis of Stopped-flow and Rapid Quench Data Using **9**.<sup>a</sup>

| Enzyme                   | $K_1^b$<br>( $\mu\text{M}^{-1}\text{s}^{-1}$ ) | $k_2^c$<br>( $\text{s}^{-1}$ ) | $k_3^b$<br>( $\text{s}^{-1}$ ) | $k_4^b$<br>( $\text{s}^{-1}$ ) |
|--------------------------|------------------------------------------------|--------------------------------|--------------------------------|--------------------------------|
| Wild-type                | 720                                            | 90                             | 3                              | 6                              |
| $\alpha\text{Y60W-CaaD}$ | 400                                            | 86                             | 8                              | 2.5                            |
| $\alpha\text{M7W-CaaD}$  | 7500                                           | -                              | 12                             | 1                              |

<sup>a</sup>Rate constants are defined in Scheme 4. <sup>b</sup>Results from fit shown in Figure 2 (raw data shown in Figure 3B). Fit for  $\alpha\text{M7W-CaaD}$  not shown (raw data shown in Figure S1B). <sup>c</sup>Value from the burst rate shown in Figure 5.

**Table S4.** Rates Constants Derived from the Alternate Global Analysis of the  $\alpha$ Y60W-CaaD Reaction with **9**.<sup>a</sup>

| Rate       | Lower Limit | Upper Limit | % Range | Best fit              | Rate          | Lower Limit | Upper Limit | % Range | Best fit                           |
|------------|-------------|-------------|---------|-----------------------|---------------|-------------|-------------|---------|------------------------------------|
| $f/f_0$    | 0.16        | 0.23        | 17%     | 0.2                   | $k_3$         | 2.4         | 4.0         | 20%     | $3.4 \text{ s}^{-1}$               |
|            |             |             |         |                       | $k_4$         | 6.5         | 11.4        | 27%     | $9.2 \text{ s}^{-1}$               |
| $k_{-1}^b$ | 2600        | 4700        | 32%     | $3300 \text{ s}^{-1}$ | $K_{d, Br}^b$ | 9100        | 20000       | 43%     | $12500 \mu\text{M}$                |
| $k_2^b$    | 65          | 100         | 22%     | $78 \text{ s}^{-1}$   | $k_{-6}^b$    | 20          | 33          | 26%     | $25 \text{ M}^{-1} \text{ s}^{-1}$ |

<sup>a</sup>The data are fit globally to the mechanism shown in Scheme 3. <sup>b</sup>Rate constants and errors for  $k_{-1}$ ,  $k_2$ ,  $K_{d, Br}$ , and  $k_{-6}$  are identical to the values presented in Table 4. See Table 4 and text for more information regarding the global fit.

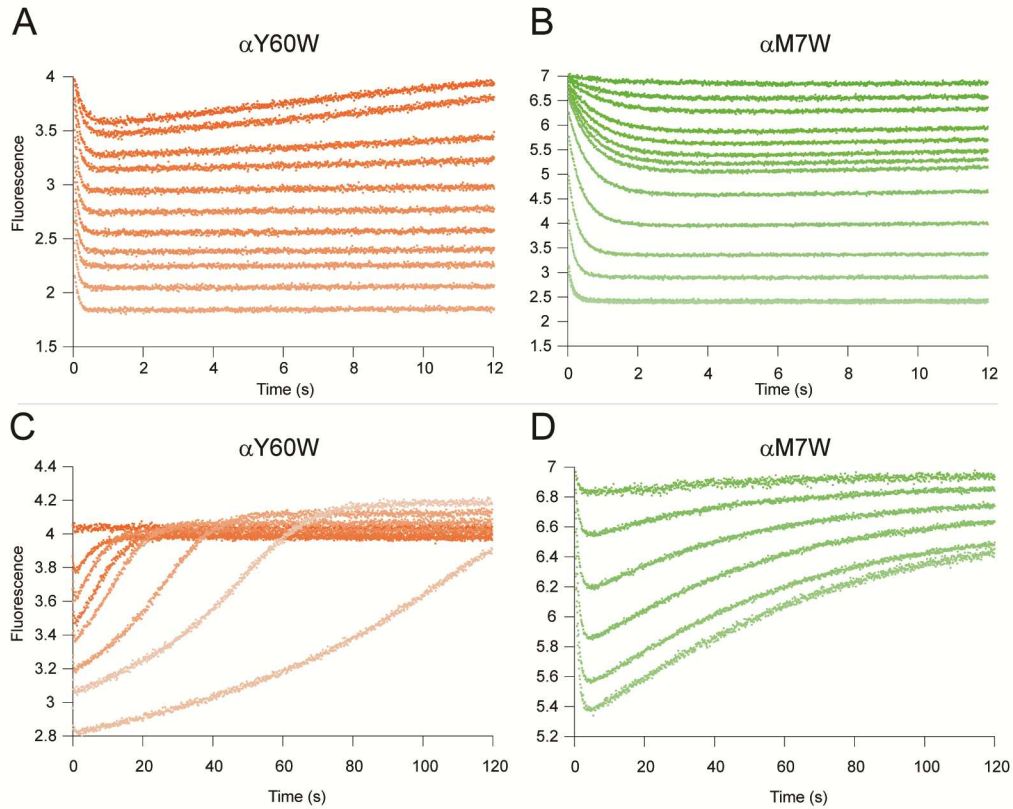

**Figure S1.** Stopped-flow fluorescence traces following A)  $\alpha$ Y60W-CaaD for 12 s; B)  $\alpha$ M7W-CaaD for 12 s; C)  $\alpha$ Y60W-CaaD for 120 s; and D)  $\alpha$ M7W-CaaD for 120 s. The  $\alpha$ Y60W-CaaD mutant shows about a 2-fold decrease in fluorescence, whereas the  $\alpha$ M7W-CaaD mutant shows a 3.5-fold decrease over the first 1 s of the reaction. Note the smaller overall amplitude observed with  $\alpha$ Y60W-CaaD.

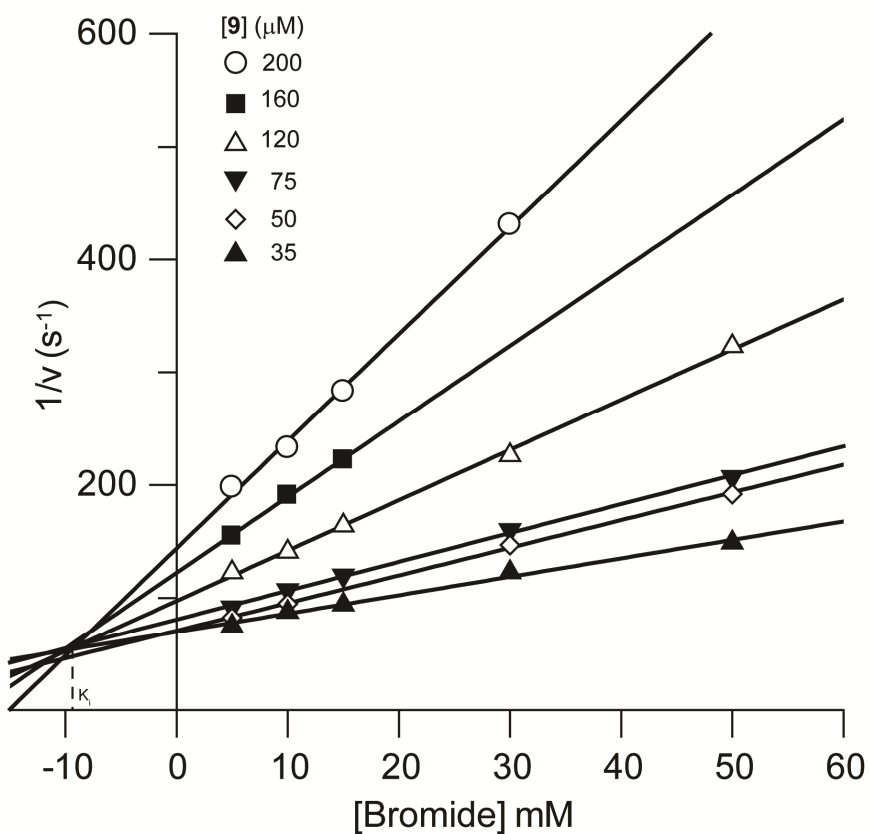

**Figure S2.** A Dixon plot of the initial reciprocal velocities ( $1/v$ ) against bromide (5, 10, 15, 30 and 50 mM) at six concentrations of **9** (35, 50, 75, 120, 160, and 200  $\mu\text{M}$ ).<sup>2</sup> The  $K_i$  for inhibition of  $\alpha\text{Y60W-CaaD}$  by bromide is determined by the intersection point of the lines resulting from a linear fit to the data (shown above as solid lines). The  $K_i$  of bromide (dashed lined extrapolation) was determined to be  $\sim 10$  mM.

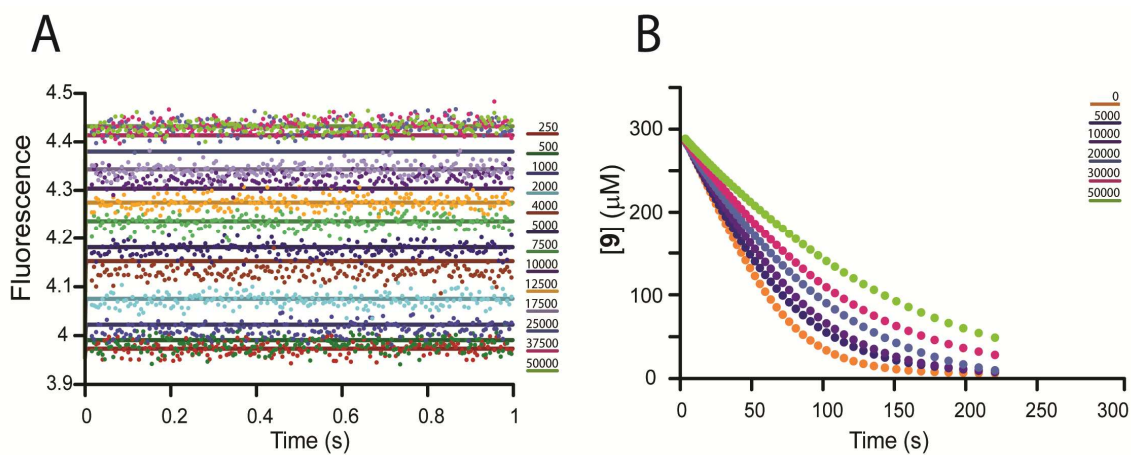

**Figure S3.** Bromide binding and inhibition. A) The stopped-flow fluorescence traces (340 nm) of  $\alpha$ Y60W-CaaD with bromide (0-37500  $\mu$ M) over 1 s. Each trace was fit to a line (slope=0) and resulting constant values (C) were further analyzed as shown in Figure S4. Solid lines correspond to the fit by simulation. Results of the fit by simulation can be found in Table S2. B) Full progress curve kinetic traces observed at 300  $\mu$ M of **9** with  $\alpha$ Y60W-CaaD in the presence of five concentrations of bromide (0, 5, 10, 20, 30, and 50 mM) are shown.



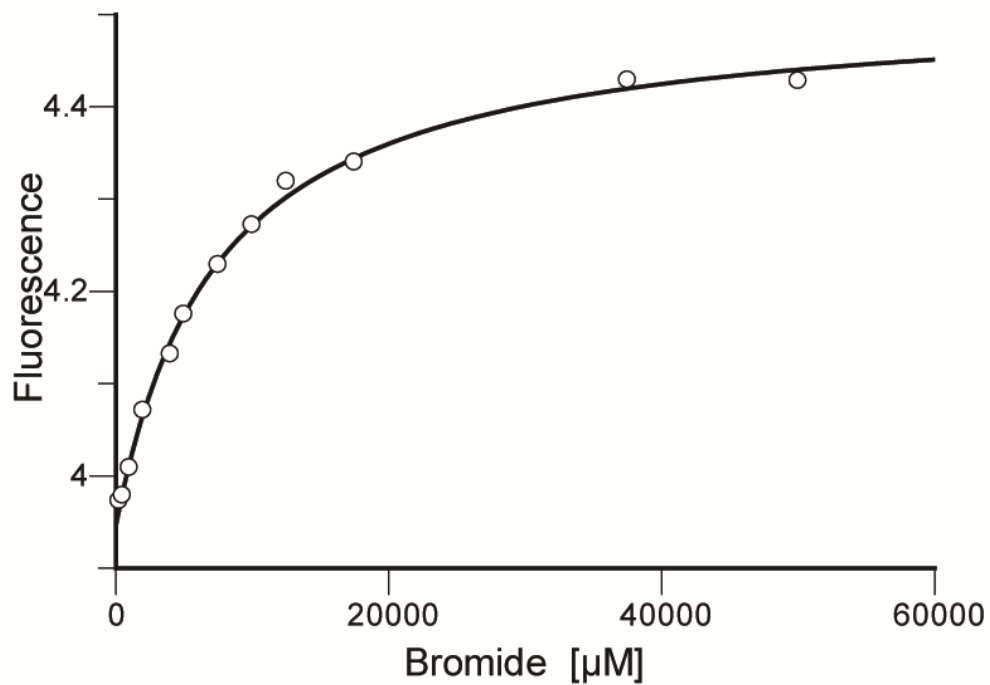

**Figure S4.** Bromide ion binding to the  $\alpha$ Y60W-CaaD mutant. Plot of constant values (C) vs. bromide concentration with fit (solid line) to eq S1.

$$F = F_0 + \Delta F \left( \frac{[X]}{K_D + [X]} \right) \quad (\text{eq. S1})$$

A summary of the fitting results is found in Table S2.

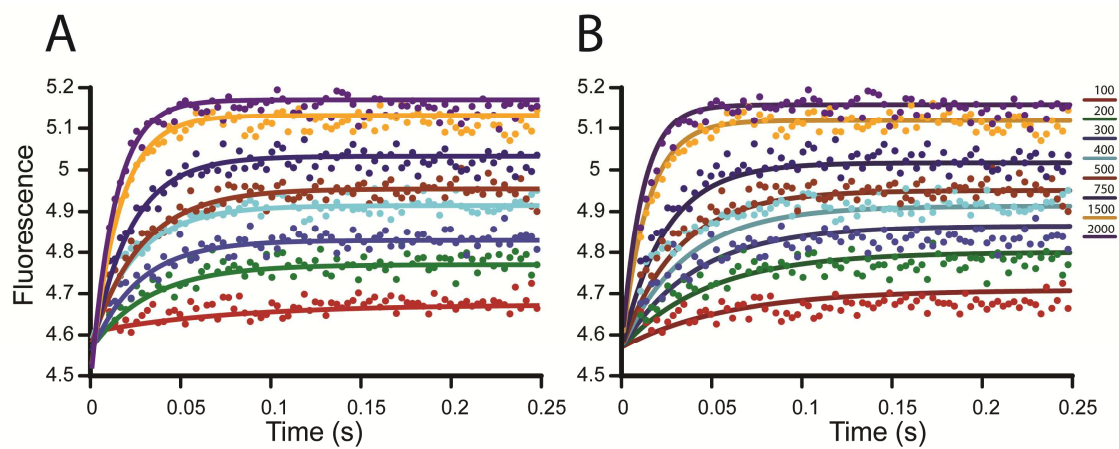

**Figure S5.** The stopped-flow fluorescence traces (250 ms) of  $\alpha\text{Y60W-CaaD}$  with **4** (0-2000  $\mu\text{M}$ ). A) Solid lines represent a single exponential fit to the data. Resultant rate vs. concentration plots are shown in Figure S6. B) Solid lines represent the fit to the data by simulation. Rate constant values resulting from the fit by simulation are found in Table S2.

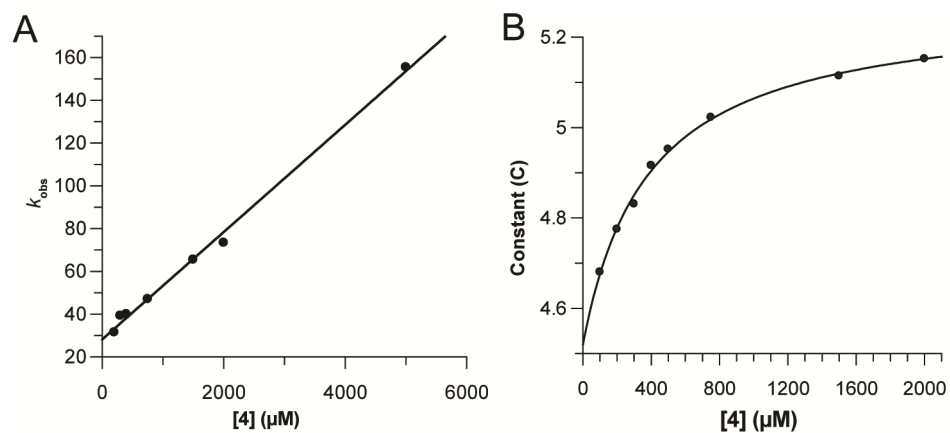

**Figure S6.** Conventional analysis of the binding of **4** to the  $\alpha$ Y60W-CaaD mutant.<sup>3</sup> A) Plot of the  $k_{obs}$  vs.  $[4]$  with fit to eq S2 (solid line). B) Plot of constant values (C) vs.  $[4]$  with fit to eq S1 (solid line).

$$k_{obs} = k_1[4] + k_{-1} \quad \text{Eq S2}$$

A summary of fitting results can be found in Table S2.

**Text S1.** The global fitting model shown in Scheme 4 incorporates two assumptions (shown in gray) regarding product release: 1) malonate semialdehyde ( $Q$  in Scheme 4) release from  $E^*PQ$  is largely irreversible, and 2) binding of  $P$  to  $E^{**}Q$  is too weak or too slow to generate  $E^*PQ$ . Although these assumptions may appear to violate the law of microscopic reversibility, their validity can be demonstrated in the product release model shown in Scheme 5.

**Scheme 5**

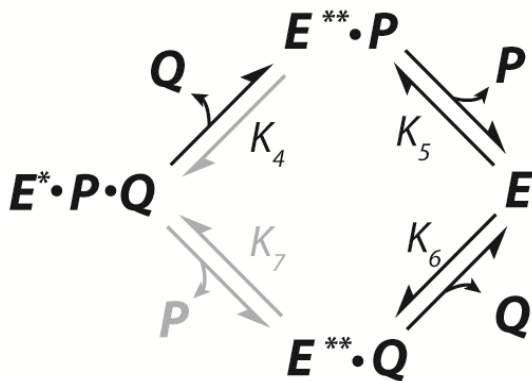

In Scheme 5,  $K_4$  is the dissociation constant for release of  $Q$  from  $E^*PQ$ ,  $K_5$  is the dissociation constant for release of  $P$  from  $E^{**}Q$ ,  $K_6$  is the dissociation constant for release of  $Q$  from  $E^{**}P$ , and  $K_7$  is the dissociation constant for release of  $P$  from  $E^*PQ$ . The product of all equilibrium constants contained in a thermodynamic cycle must be equal to unity. Therefore, the product of constants on one side of the pathway must be equal to the product of the constants on the other side (eq. S3):

$$K_4^D \bullet K_5^D = K_6^D \bullet K_7^D \quad \text{eq S3}$$

Rearrangement of eq. S3 to make the binding of  $Q$  to  $E^{**}P$  versus  $E$  equal to the binding of  $P$  to  $E^{**}Q$  versus  $E$  gives eq. S4:

$$\frac{K_4^D}{K_6^D} = \frac{K_7^D}{K_5^D} \quad \text{eq S4}$$

Experimental data provides approximations of the values for  $K_6^D$  ( $\sim 0.6$  mM) and  $K_5^D$  ( $\sim 12$  mM<sup>-1</sup>). Substituting these values in their respective positions and rearranging yields eq S5:

$$\frac{K_4^D}{0.6} = \frac{K_7^D}{12} \quad \text{eq S5}$$

Solving Eq. S5 yields eq. S6:

$$K_4^D = 20 \bullet K_7^D \quad \text{eq S6}$$

Eq. S5 demonstrates that the dissociation constants for  $K_4^D$  and  $K_7^D$  are proportional. As a result, an assumption of irreversible release of **4** (large value  $K_4^D$ ) would correspond to an even larger dissociation constant for Br (i.e., bromide doesn't bind to  $E^{**}Q$ ).

Moreover, Eq. S6 shows that  $Q$  binds to species  $E^{**}P (K_4^D)$  approximately 20 times tighter than  $P$  binds to species  $E^{**}Q (K_7^D)$ . In conclusion, the assumptions associated with the product release and rebinding in Scheme 3 are consistent with the collected data.

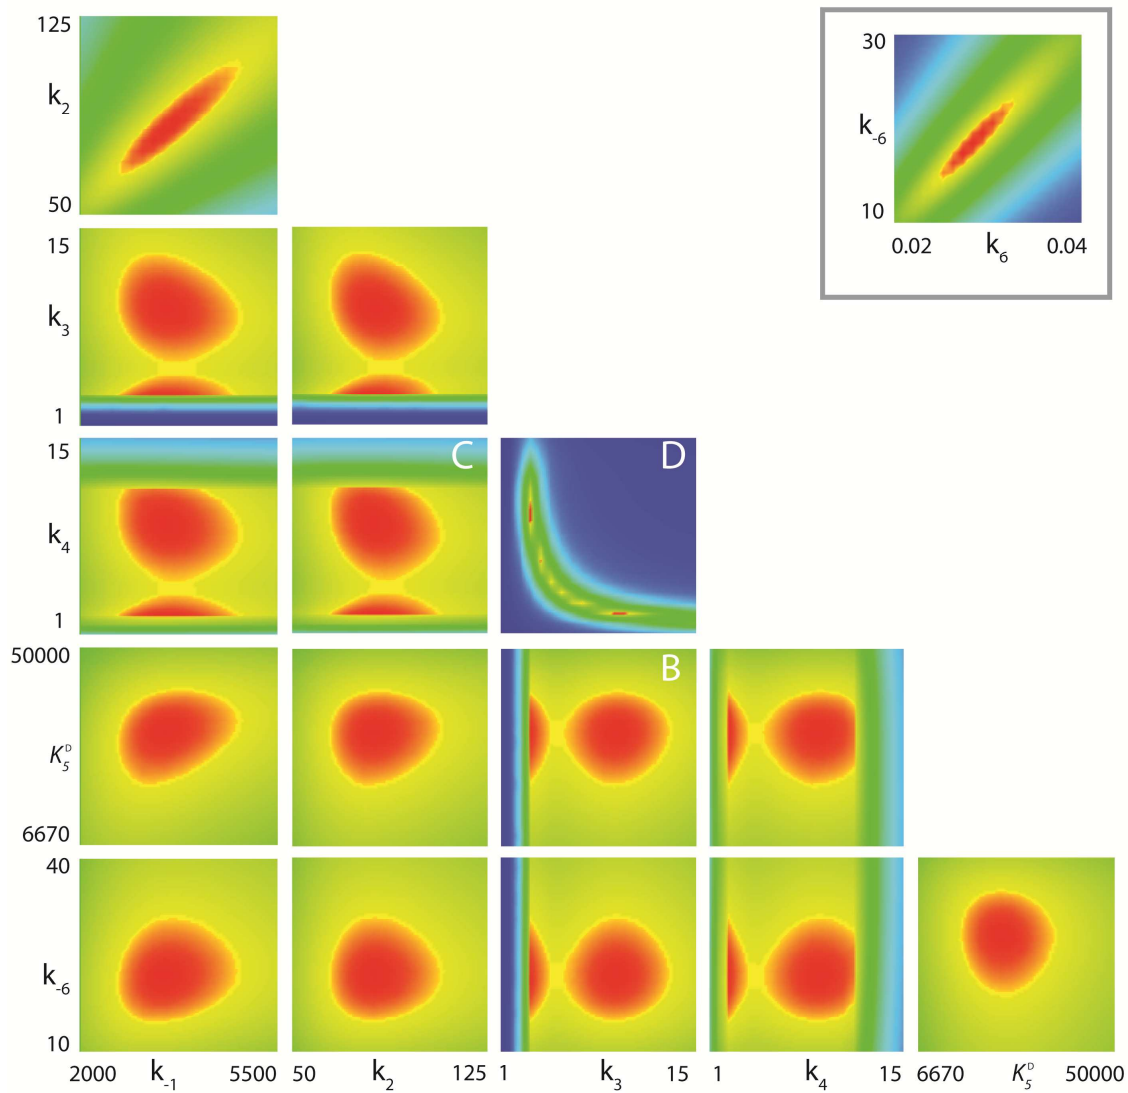

**Figure S7.** FitSpace confidence contours for the global fit of the kinetic data shown in Figure 7A-I (Y60W-CaaD and **9**) to the model in Scheme 4.<sup>5</sup> The inset shows the FitSpace confidence contours for the fit by simulation of **4** binding to  $\alpha$ Y60W-CaaD (Figure 7G). The fluorescence factor of  $E^{**}$  was held fixed at 1.13. The letters B, C, and D (shown in white) refer to select results used in Figure 8.

References:

- (1) Trott, O., and Olson, A. J. (2009) AutoDock vina: improving the speed and accuracy of docking with a new scoring function, efficient optimization, and multithreading, *J. Comput. Chem.*, 455-461.
- (2) Dixon, M. (1953) Determination of enzyme-inhibitor constants, *Biochem. J.* 55, 170-171.
- (3) Johnson, K. A. (1992) Transient-state kinetic analysis of enzyme reaction pathways, In *The Enzymes* (Sigman, D. S., Eds.) (3rd ed.) ed., pp 1-61.
- (4) Segel, I. H. (1993) *Enzyme kinetics: behavior and analysis of rapid equilibrium and steady-state enzyme systems*, Wiley Classics Library, New York.
- (5) Johnson, K. A., Simpson, Z. B., and Blom, T. (2009) FitSpace explorer: an algorithm to evaluate multidimensional parameter space in fitting kinetic data, *Anal. Biochem.* 387, 30-41.
